# Supplementary material for: ANO1/TMEM16A interacts with EGFR and correlates with sensitivity to EGFR-targeting therapy in head and neck cancer
Source: PubMed Central journal article supplement (PMC4496210; doi:10.18632/oncotarget.3277), 2015-03-16
Supplement: oncotarget-06-9173-s001.pdf [file oncotarget-06-9173-s001.pdf]

## SUPPLEMENTARY FIGURES AND TABLES

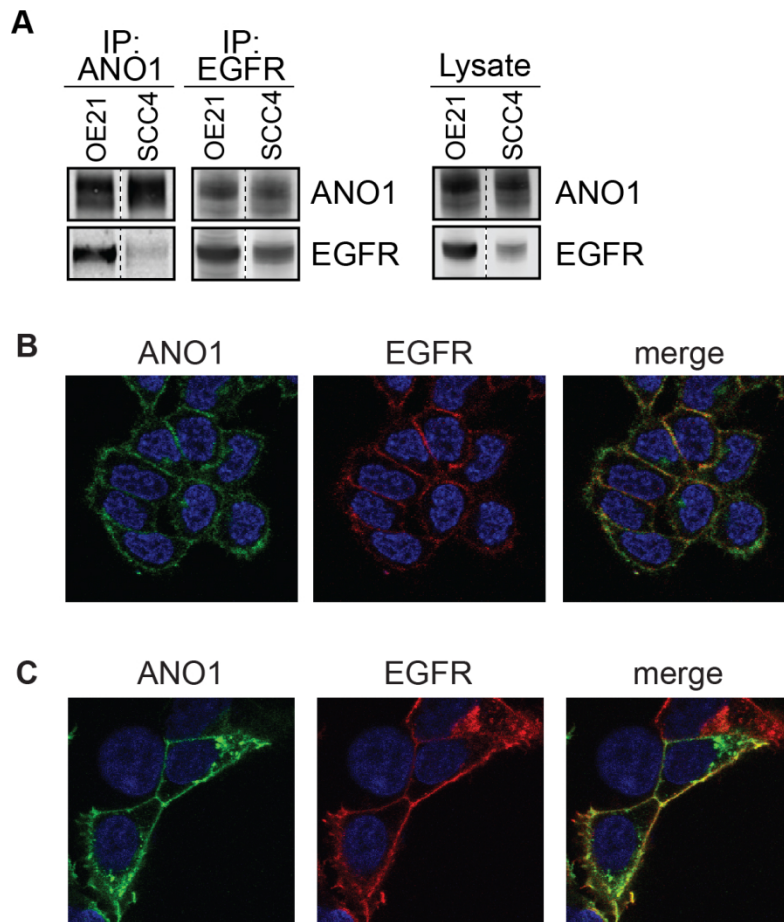

**Supplementary Figure S1: ANO1 and EGFR interact.** **A.** Immunoblot after immunoprecipitation of ANO1 (left) or EGFR (middle) from OE21 and SCC4 cell lysates (right) using an anti-ANO1 or anti-EGFR antibody coupled to magnetic beads. Eluted proteins were run on a western blot and probed with antibodies against ANO1 and EGFR. Representative immunoblots are shown. **B.** Immunofluorescence of ANO1 (green) and EGFR (red) in Te11 cells analyzed by confocal microscopy. Representative images are shown. **C.** Immunofluorescence of ANO1 (green) and EGFR (red) in HEK293T cells transfected with equal amounts of plasmids coding for ANO1 and EGFR analyzed by confocal microscopy. Representative images are shown.

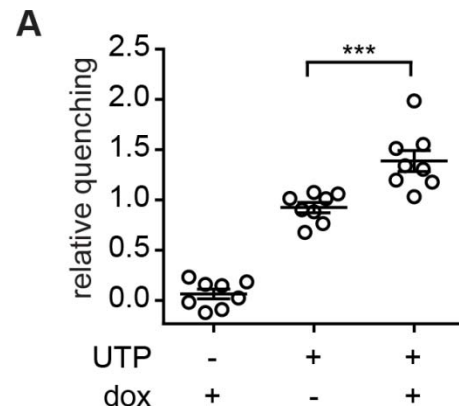

**Supplementary Figure S2: Expression of lz-EGFR increases ANO1 protein levels and ANO1-dependent chloride currents in Te11 cells.** A. Te11 lz-EGFR cells were pretreated with or without dox, transiently transfected with YFP-H148Q/I152L and ANO1-dependent chloride currents were assessed by measuring quenching of YFP-fluorescence. Data are presented as the average  $\pm$  SEM of normalized values,  $n = 8$ , \*\*\* $p < 0.001$ .

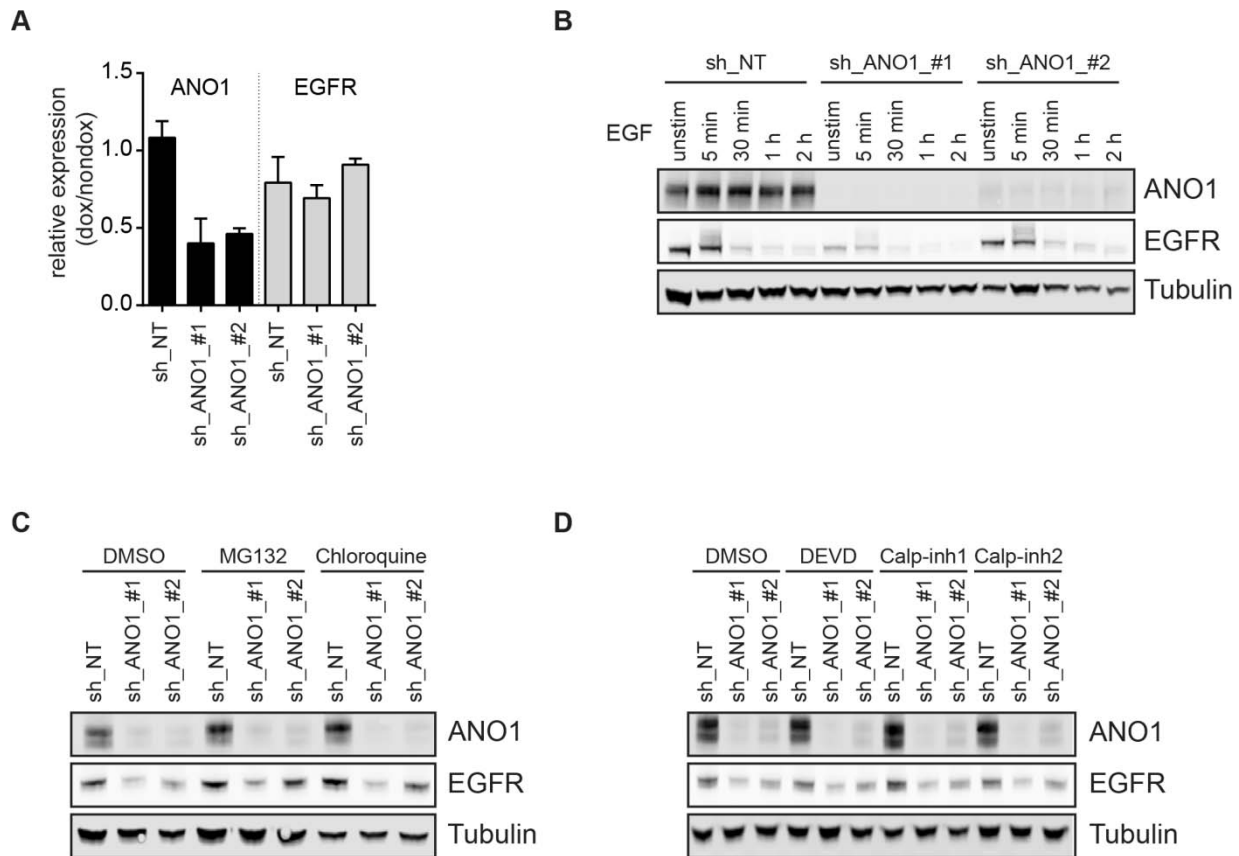

**Supplementary Figure S3: Knockdown of ANO1 reduces EGFR protein levels.** **A.** Relative mRNA-levels of ANO1 and EGFR in Te11 cells treated as in Figure 3D. mRNA-levels in dox-treated samples were normalized to the respective non-dox treated sample and are presented as the mean  $\pm$  SEM of three independent experiments. **B.** Immunoblots of EGFR and ANO1 protein levels in Te11 cells after knockdown of ANO1 and stimulation with 100 ng/ml EGF for the indicated time periods. Representative immunoblots are shown. **C.** Immunoblots of EGFR and ANO1 protein levels in Te11 cells after knockdown of ANO1 and treatment with MG132 (15  $\mu$ M), Chloroquine (100  $\mu$ M) or DMSO. Representative immunoblots are shown. **D.** Immunoblots of EGFR and ANO1 protein levels in Te11 cells after knockdown of ANO1 and treatment with Z-DEVD-FMK, (100  $\mu$ M), Calp-inh1 (PD150606, 20  $\mu$ M), Calp-inh2 (MDL28170, 20  $\mu$ M) or DMSO. Representative immunoblots are shown.

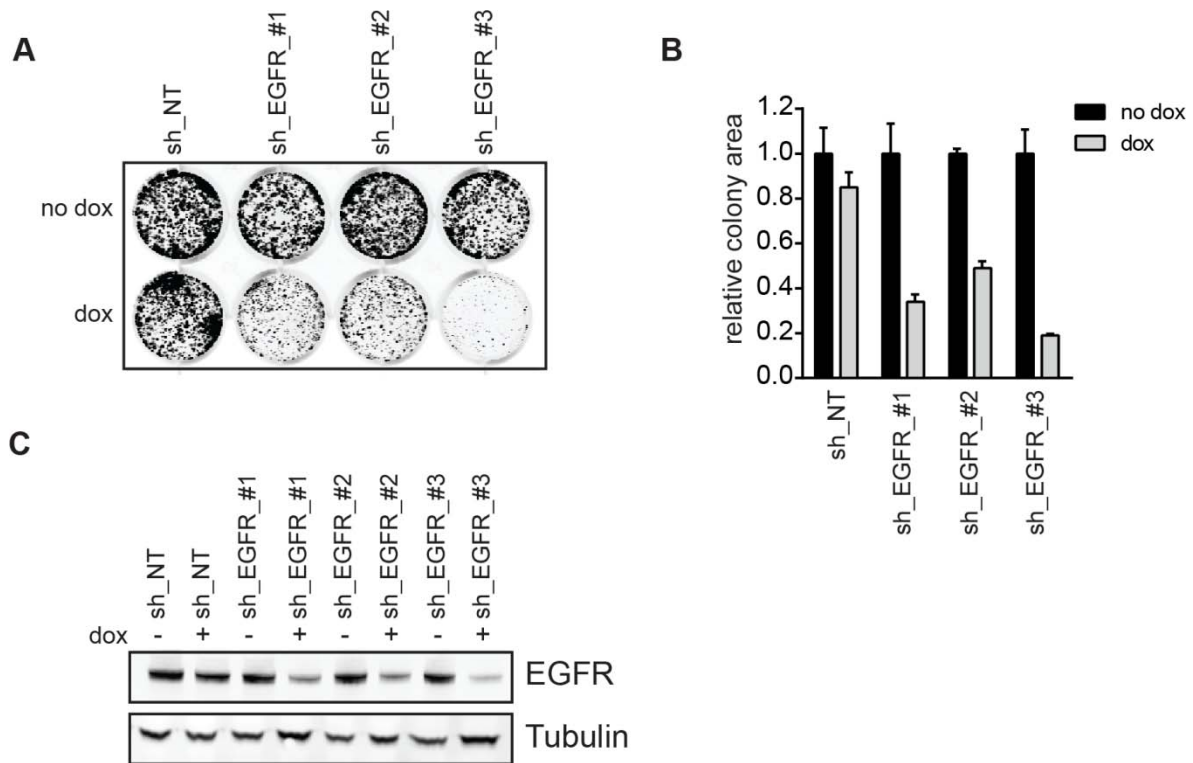

**Supplementary Figure S4: Knockdown of EGFR reduces cell viability.** **A.** Colony formation assay of Te11 cells stably expressing dox-inducible shRNAs against EGFR or a non-targeting control. Colonies were stained 10 days after addition of dox. **B.** Quantification of the relative colony area of Te11 cells treated as in A. Values were normalized to the respective non-dox treated sample and are presented as the mean  $\pm$  SEM of three independent experiments. **C.** Immunoblot of EGFR protein levels in Te11 cells stably expressing dox-inducible shRNAs against EGFR or a non-targeting control after treatment with dox for 3 days.

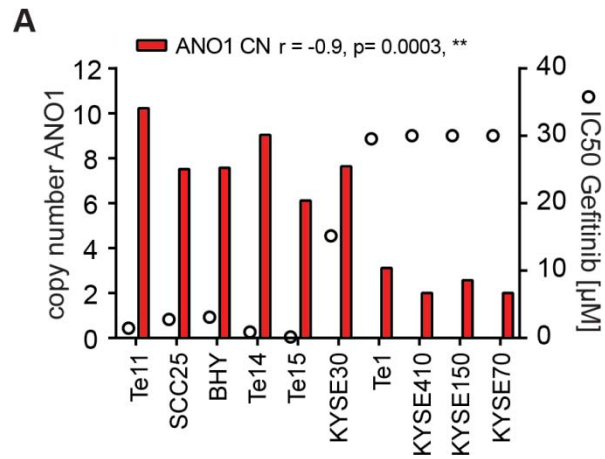

**Supplementary Figure S5: Amplification of ANO1 correlates with sensitivity to Gefitinib. A.** Copy number of ANO1 (bars, left y-axis) and sensitivity to Gefitinib (IC<sub>50</sub>, circles, right y-axis) of HNSCC cell lines, determined by genomic PCR and Cell Titer Glo, respectively. A Pearson-correlation test was used to test for correlation between ANO1 copy number and sensitivity to Gefitinib.

**Supplementary Table S1. Proteins identified in all three experiments with 2 or more unique peptides****Supplementary Table S2. Expression of ANO1 correlates with sensitivity to EGFR-targeted therapy**

Table summarizes the effect of EGFR kinase inhibitors on the proliferation of head and neck cancer cell lines. IC50 values ( $\mu\text{M}$ ) of the inhibition of cell proliferation (CellTiter glow assay) are given as the mean of at least three experiments.

| IC50 ( $\mu\text{M}$ ) |           |           |           |          |        |                      |
|------------------------|-----------|-----------|-----------|----------|--------|----------------------|
|                        | Gefitinib | Erlotinib | Lapatinib | Afatinib | AEE788 |                      |
| Te11                   | 1.45      | 1.00      | 0.41      | 0.32     | 0.22   | high ANO1 expression |
| SCC25                  | 2.74      | 2.08      | 2.39      | 2.36     | 1.29   |                      |
| BHY                    | 3.08      | 1.50      | 2.58      | 0.21     | 1.40   |                      |
| Te14                   | 0.87      | 3.78      | 1.29      | 0.06     | 0.80   |                      |
| Te15                   | 0.15      | 0.02      | 0.23      | 0.07     | 0.14   |                      |
|                        |           |           |           |          |        |                      |
| KYSE30                 | 15.16     | 30.00     | 8.32      | 9.97     | 16.25  | low ANO1 expression  |
| Te1                    | 29.55     | 20.47     | 15.98     | 5.19     | 10.64  |                      |
| KYSE410                | 30.00     | 11.01     | 5.98      | 3.91     | 2.44   |                      |
| KYSE150                | 30.00     | 30.00     | 6.95      | 30.00    | 7.96   |                      |
| KYSE70                 | 30.00     | 15.75     | 9.61      | 4.26     | 5.67   |                      |
